# Supplementary material for: Prognostic significance and immune correlates of CD73 expression in renal cell carcinoma
Source: PubMed Central journal article supplement (PMC7661372; doi:10.1136/jitc-2020-001467), 2020-11-11

## SUPPLEMENTARY DATA

**Supplementary Table 1:** Comparison of gene expression signatures between Low, Intermediate (Int) and High *NT5E* expression groups

| Gene Expression Signature      | P<br>Low vs. Int | P<br>Int vs. High | P<br>Low vs. High | FDR-p<br>Low vs. Int | FDR-p<br>Int vs. High | FDR-p<br>Low vs. High | Reject |
|--------------------------------|------------------|-------------------|-------------------|----------------------|-----------------------|-----------------------|--------|
| Angiogenesis                   | 4.55E-07         | 6.82E-03          | 5.49E-04          | 1.37E-05             | 1.57E-01              | 1.20E-02              | FALSE  |
| Myeloid Inflammation           | 4.82E-02         | 3.28E-01          | 1.10E-01          | 4.99E-01             | 8.79E-01              | 3.73E-01              | FALSE  |
| T effector                     | 6.71E-05         | 4.84E-02          | 9.66E-03          | 1.68E-03             | 6.15E-01              | 1.19E-01              | FALSE  |
| Activated B cell               | 4.88E-02         | 3.43E-01          | 4.17E-02          | 4.99E-01             | 8.79E-01              | 3.37E-01              | FALSE  |
| Activated CD4 T cell           | 5.23E-04         | 3.26E-01          | 5.78E-04          | 1.14E-02             | 8.79E-01              | 1.21E-02              | FALSE  |
| Activated CD8 T cell           | 1.83E-01         | 1.10E-01          | 2.92E-02          | 7.56E-01             | 8.05E-01              | 3.00E-01              | FALSE  |
| Activated dendritic cell       | 1.40E-05         | 1.90E-01          | 1.85E-03          | 3.79E-04             | 8.79E-01              | 2.92E-02              | FALSE  |
| CD56bright natural killer cell | 1.13E-04         | 2.01E-01          | 6.14E-05          | 2.71E-03             | 8.79E-01              | 1.66E-03              | FALSE  |
| CD56dim natural killer cell    | 3.44E-07         | 5.05E-02          | 1.68E-04          | 1.07E-05             | 6.15E-01              | 4.02E-03              | FALSE  |
| Central memory CD4 T cell      | 1.62E-01         | 2.41E-02          | 8.12E-03          | 7.56E-01             | 4.25E-01              | 1.08E-01              | FALSE  |
| Central memory CD8 T cell      | 4.18E-01         | 2.31E-03          | 4.38E-02          | 8.03E-01             | 5.85E-02              | 3.37E-01              | FALSE  |
| Effector memory CD4 T cell     | 1.44E-02         | 1.13E-02          | 9.70E-05          | 2.07E-01             | 2.38E-01              | 2.42E-03              | FALSE  |
| Effector memory CD8 T cell     | 2.23E-05         | 1.18E-01          | 6.87E-04          | 5.79E-04             | 8.05E-01              | 1.37E-02              | FALSE  |
| Eosinophil                     | 1.81E-02         | 6.81E-02          | 7.49E-04          | 2.39E-01             | 6.98E-01              | 1.41E-02              | FALSE  |
| Gamma delta T cell             | 2.48E-01         | 4.66E-02          | 3.23E-01          | 7.59E-01             | 6.15E-01              | 5.02E-01              | FALSE  |
| Immature B cell                | 4.93E-02         | 3.72E-02          | 2.59E-03          | 4.99E-01             | 5.49E-01              | 3.82E-02              | FALSE  |
| Immature dendritic cell        | 1.88E-04         | 4.46E-01          | 1.40E-03          | 4.32E-03             | 8.79E-01              | 2.35E-02              | FALSE  |
| MDSC                           | 4.71E-01         | 2.38E-02          | 6.79E-02          | 8.03E-01             | 4.25E-01              | 3.50E-01              | FALSE  |
| Macrophage                     | 1.05E-01         | 2.54E-01          | 6.80E-02          | 6.72E-01             | 8.79E-01              | 3.50E-01              | FALSE  |
| Mast cell                      | 1.89E-01         | 4.36E-01          | 2.94E-01          | 7.56E-01             | 8.79E-01              | 5.02E-01              | FALSE  |
| Memory B cell                  | 1.13E-03         | 2.27E-01          | 1.84E-04          | 2.34E-02             | 8.79E-01              | 4.22E-03              | FALSE  |
| Monocyte                       | 1.13E-03         | 1.56E-01          | 3.67E-02          | 2.34E-02             | 8.69E-01              | 3.37E-01              | FALSE  |
| Natural killer T cell          | 2.97E-01         | 7.28E-02          | 5.97E-02          | 7.59E-01             | 6.98E-01              | 3.50E-01              | FALSE  |
| Natural killer cell            | 6.06E-02         | 7.35E-04          | 6.54E-05          | 4.99E-01             | 1.97E-02              | 1.70E-03              | FALSE  |
| Neutrophil                     | 5.82E-03         | 2.12E-01          | 1.31E-03          | 1.05E-01             | 8.79E-01              | 2.33E-02              | FALSE  |
| Plasmacytoid dendritic cell    | 4.52E-01         | 6.89E-02          | 1.83E-01          | 8.03E-01             | 6.98E-01              | 4.55E-01              | FALSE  |
| Regulatory T cell              | 2.79E-06         | 1.92E-05          | 3.90E-12          | 8.08E-05             | 5.56E-04              | 1.21E-10              | TRUE   |
| T follicular helper cell       | 1.03E-05         | 1.75E-05          | 3.92E-11          | 2.88E-04             | 5.25E-04              | 1.18E-09              | TRUE   |
| Type 1 T helper cell           | 1.39E-01         | 1.59E-01          | 4.03E-02          | 7.40E-01             | 8.69E-01              | 3.37E-01              | FALSE  |
| Type 17 T helper cell          | 6.06E-03         | 6.87E-04          | 2.40E-06          | 1.05E-01             | 1.91E-02              | 6.73E-05              | FALSE  |
| Type 2 T helper cell           | 6.02E-03         | 5.03E-08          | 1.18E-08          | 1.05E-01             | 1.56E-06              | 3.41E-07              | FALSE  |

**Supplementary Table 2:** Comparison of gene expression signatures between Low, Intermediate (Int) and High *ADORA2A* gene expression groups

| Gene Expression Signature      | P<br>Low vs. Int | P<br>Int vs. High | P<br>Low vs. High | FDR-p<br>Low vs. Int | FDR-p<br>Int vs. High | FDR-p<br>Low vs. High | Reject |
|--------------------------------|------------------|-------------------|-------------------|----------------------|-----------------------|-----------------------|--------|
| Angiogenesis                   | 7.83E-28         | 6.98E-06          | 4.37E-36          | 0.00E+00             | 1.33E-04              | 0.00E+00              | TRUE   |
| Myeloid Inflammation           | 3.91E-01         | 4.59E-01          | 3.69E-01          | 8.36E-01             | 8.60E-01              | 8.82E-01              | FALSE  |
| T effector                     | 5.40E-18         | 1.93E-02          | 1.48E-21          | 0.00E+00             | 2.24E-01              | 0.00E+00              | FALSE  |
| Activated B cell               | 8.22E-07         | 3.66E-02          | 3.97E-04          | 1.48E-05             | 3.36E-01              | 5.86E-03              | FALSE  |
| Activated CD4 T cell           | 1.22E-12         | 3.93E-01          | 1.26E-11          | 3.18E-11             | 8.60E-01              | 2.77E-10              | FALSE  |
| Activated CD8 T cell           | 5.30E-07         | 3.25E-01          | 3.40E-07          | 1.06E-05             | 8.60E-01              | 6.81E-06              | FALSE  |
| Activated dendritic cell       | 6.40E-02         | 4.80E-14          | 8.11E-16          | 3.28E-01             | 1.44E-12              | 2.02E-14              | FALSE  |
| CD56bright natural killer cell | 4.47E-01         | 5.42E-07          | 2.70E-05          | 8.36E-01             | 1.08E-05              | 4.87E-04              | FALSE  |
| CD56dim natural killer cell    | 6.24E-21         | 4.77E-02          | 2.32E-22          | 0.00E+00             | 3.87E-01              | 0.00E+00              | FALSE  |
| Central memory CD4 T cell      | 5.05E-12         | 4.36E-03          | 7.56E-09          | 1.26E-10             | 6.76E-02              | 1.59E-07              | FALSE  |
| Central memory CD8 T cell      | 1.56E-04         | 1.33E-09          | 8.11E-02          | 2.02E-03             | 3.60E-08              | 5.33E-01              | FALSE  |
| Effector memory CD4 T cell     | 2.21E-03         | 1.34E-07          | 1.37E-01          | 1.76E-02             | 2.95E-06              | 6.93E-01              | FALSE  |
| Effector memory CD8 T cell     | 3.60E-18         | 3.63E-01          | 1.38E-18          | 0.00E+00             | 8.60E-01              | 0.00E+00              | FALSE  |
| Eosinophil                     | 1.96E-01         | 9.85E-02          | 4.35E-02          | 6.63E-01             | 5.64E-01              | 3.59E-01              | FALSE  |
| Gamma delta T cell             | 4.86E-09         | 6.56E-02          | 1.91E-06          | 1.07E-07             | 4.57E-01              | 3.63E-05              | FALSE  |
| Immature B cell                | 1.42E-02         | 9.85E-02          | 2.53E-03          | 9.54E-02             | 5.64E-01              | 2.74E-02              | FALSE  |
| Immature dendritic cell        | 2.12E-22         | 5.23E-15          | 9.97E-38          | 0.00E+00             | 1.62E-13              | 0.00E+00              | TRUE   |
| MDSC                           | 3.04E-05         | 4.13E-07          | 4.98E-01          | 4.56E-04             | 8.67E-06              | 8.82E-01              | FALSE  |
| Macrophage                     | 2.51E-06         | 2.38E-02          | 4.48E-04          | 4.26E-05             | 2.51E-01              | 5.86E-03              | FALSE  |
| Mast cell                      | 5.35E-04         | 4.43E-08          | 3.51E-01          | 5.87E-03             | 1.11E-06              | 8.82E-01              | FALSE  |
| Memory B cell                  | 4.01E-01         | 3.51E-01          | 4.08E-01          | 8.36E-01             | 8.60E-01              | 8.82E-01              | FALSE  |
| Monocyte                       | 7.59E-04         | 1.80E-10          | 1.96E-14          | 6.81E-03             | 5.21E-09              | 4.91E-13              | TRUE   |
| Natural killer T cell          | 3.64E-01         | 7.41E-08          | 3.92E-04          | 8.36E-01             | 1.78E-06              | 5.86E-03              | FALSE  |
| Natural killer cell            | 3.78E-05         | 2.14E-09          | 3.48E-01          | 5.29E-04             | 5.57E-08              | 8.82E-01              | FALSE  |
| Neutrophil                     | 5.70E-09         | 1.32E-02          | 1.42E-12          | 1.20E-07             | 1.81E-01              | 3.40E-11              | FALSE  |
| Plasmacytoid dendritic cell    | 5.87E-07         | 4.92E-04          | 7.50E-04          | 1.12E-05             | 8.33E-03              | 8.96E-03              | TRUE   |
| Regulatory T cell              | 1.54E-09         | 1.04E-04          | 3.37E-05          | 3.71E-08             | 1.87E-03              | 5.73E-04              | TRUE   |
| T follicular helper cell       | 1.75E-05         | 8.36E-08          | 2.51E-01          | 2.80E-04             | 1.92E-06              | 8.24E-01              | FALSE  |
| Type 1 T helper cell           | 5.41E-04         | 3.09E-10          | 1.39E-01          | 5.87E-03             | 8.65E-09              | 6.93E-01              | FALSE  |
| Type 17 T helper cell          | 2.65E-09         | 1.57E-02          | 4.11E-12          | 6.09E-08             | 1.99E-01              | 9.45E-11              | FALSE  |
| Type 2 T helper cell           | 1.94E-04         | 1.29E-01          | 6.21E-05          | 2.33E-03             | 5.64E-01              | 9.94E-04              | FALSE  |

**Supplementary Table 2:** Comparison of gene expression signatures between Low, Intermediate (Int) and High *ENTPDI* gene expression groups

| Gene Expression Signature      | p<br>Low vs. Int | p<br>Int vs. High | P<br>Low vs High | FDR-p<br>Low vs. Int | FDR-p<br>Int vs. High | FDR-p<br>Low vs. High | Reject |
|--------------------------------|------------------|-------------------|------------------|----------------------|-----------------------|-----------------------|--------|
| Angiogenesis                   | 4.18325E-24      | 0.415835873       | 1.33113E-23      | 0                    | 0.957489691           | 0                     | FALSE  |
| Myeloid Inflammation           | 0.272382913      | 0.365879288       | 0.171828358      | 0.480005731          | 0.957489691           | 0.368136465           | FALSE  |
| T effector                     | 4.39035E-30      | 0.384326098       | 1.87486E-28      | 0                    | 0.957489691           | 0                     | FALSE  |
| Activated B cell               | 4.74908E-10      | 0.098600287       | 3.47068E-12      | 9.02325E-09          | 0.82876361            | 6.59427E-11           | FALSE  |
| Activated CD4 T cell           | 1.67278E-15      | 0.078489271       | 2.12014E-18      | 3.9968E-14           | 0.770381368           | 0                     | FALSE  |
| Activated CD8 T cell           | 8.15037E-11      | 0.125925059       | 4.1784E-08       | 1.71158E-09          | 0.883914303           | 5.43192E-07           | FALSE  |
| Activated dendritic cell       | 0.009662161      | 0.368980664       | 0.033404112      | 0.083673264          | 0.957489691           | 0.156228766           | FALSE  |
| CD56bright natural killer cell | 0.063735802      | 0.023165957       | 0.001011851      | 0.326417957          | 0.37422857            | 0.007061494           | FALSE  |
| CD56dim natural killer cell    | 6.72871E-27      | 0.248620144       | 8.29933E-27      | 0                    | 0.956902208           | 0                     | FALSE  |
| Central memory CD4 T cell      | 2.62163E-15      | 3.62573E-06       | 2.12242E-21      | 6.12843E-14          | 0.000101515           | 0                     | TRUE   |
| Central memory CD8 T cell      | 0.00027132       | 0.215097045       | 0.000166459      | 0.002980472          | 0.947507965           | 0.001663346           | FALSE  |
| Effector memory CD4 T cell     | 6.80351E-07      | 0.012277749       | 1.65413E-10      | 1.08856E-05          | 0.237979912           | 2.84834E-09           | FALSE  |
| Effector memory CD8 T cell     | 5.10928E-33      | 0.358304253       | 7.89604E-33      | 0                    | 0.957489691           | 0                     | FALSE  |
| Eosinophil                     | 0.002423853      | 0.251951865       | 0.000436363      | 0.023975855          | 0.956902208           | 0.003485576           | FALSE  |
| Gamma delta T cell             | 1.41025E-06      | 0.004316079       | 2.03176E-08      | 1.83331E-05          | 0.098603536           | 2.84446E-07           | FALSE  |
| Immature B cell                | 0.094587763      | 0.140570705       | 0.012258841      | 0.391540329          | 0.896925249           | 0.071335368           | FALSE  |
| Immature dendritic cell        | 5.68914E-30      | 0.000349844       | 6.38711E-34      | 0                    | 0.009056287           | 0                     | TRUE   |
| MDSC                           | 9.55839E-07      | 0.031239847       | 3.20506E-09      | 1.33817E-05          | 0.452846632           | 4.80759E-08           | FALSE  |
| Macrophage                     | 1.20912E-10      | 0.288817677       | 1.58241E-10      | 2.41825E-09          | 0.956902208           | 2.84834E-09           | FALSE  |
| Mast cell                      | 0.179171615      | 0.391781508       | 0.314610278      | 0.480005731          | 0.957489691           | 0.368136465           | FALSE  |
| Memory B cell                  | 0.01015126       | 0.202839727       | 0.089276934      | 0.083673264          | 0.947507965           | 0.312068265           | FALSE  |
| Monocyte                       | 7.14201E-06      | 0.39638948        | 9.61746E-05      | 8.57007E-05          | 0.957489691           | 0.001057412           | FALSE  |
| Natural killer T cell          | 0.046665988      | 0.008904332       | 0.000324513      | 0.284325383          | 0.185936491           | 0.002916827           | FALSE  |
| Natural killer cell            | 8.61035E-07      | 5.65779E-08       | 1.49486E-17      | 1.29154E-05          | 1.64076E-06           | 0                     | TRUE   |
| Neutrophil                     | 2.63899E-14      | 0.000223255       | 1.81924E-20      | 5.81313E-13          | 0.006010424           | 0                     | TRUE   |
| Plasmacytoid dendritic cell    | 1.32509E-09      | 0.149091769       | 1.56457E-09      | 2.25266E-08          | 0.896925249           | 2.50331E-08           | FALSE  |
| Regulatory T cell              | 2.51999E-27      | 5.67783E-09       | 1.5765E-37       | 0                    | 1.70335E-07           | 0                     | TRUE   |
| T follicular helper cell       | 5.27695E-10      | 0.014759917       | 4.59707E-13      | 9.4985E-09           | 0.268214983           | 9.19487E-12           | FALSE  |
| Type 1 T helper cell           | 0.2099327        | 0.32615225        | 0.141893686      | 0.480005731          | 0.957489691           | 0.368136465           | FALSE  |
| Type 17 T helper cell          | 1.11412E-17      | 0.002968156       | 3.19536E-22      | 0                    | 0.07162008            | 0                     | FALSE  |
| Type 2 T helper cell           | 0.15082023       | 3.65469E-14       | 4.4812E-06       | 0.480005731          | 1.13232E-12           | 5.3773E-05            | FALSE  |

**Supplementary Figure 1: Patient selection for the DF/HCC institutional dataset**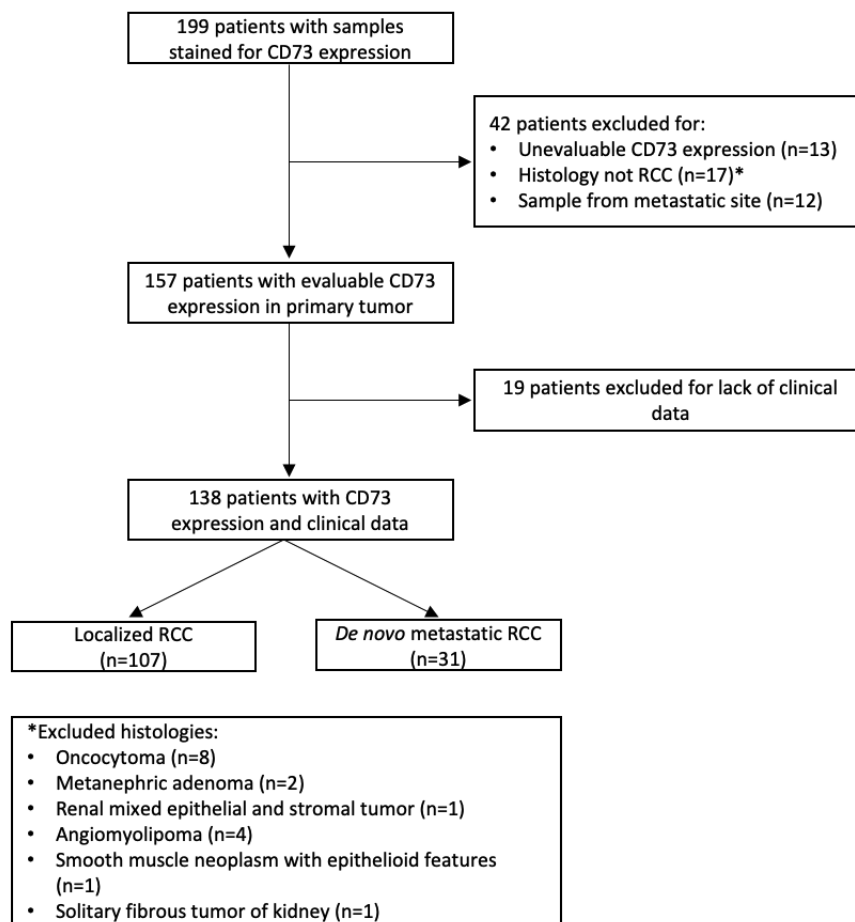

**Supplementary Figure 2: Kaplan-Meier plot of OS according to CD73 expression in patients with *de novo* metastatic RCC**

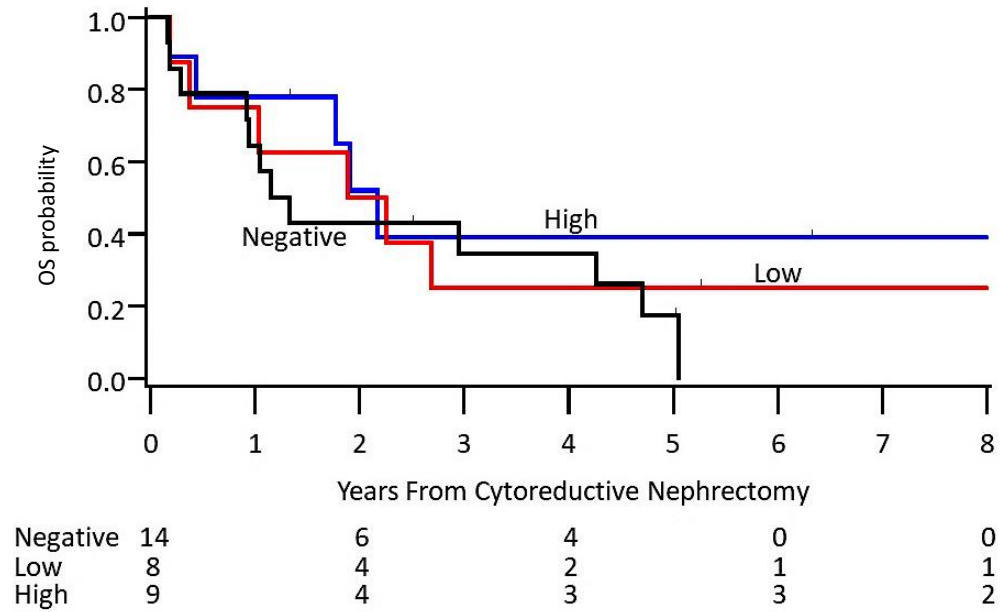

**Supplementary Figure 3. Correlation of *NT5E* expression in TCGA cohort with overall survival (A, B and C) and AJCC stage (D)**

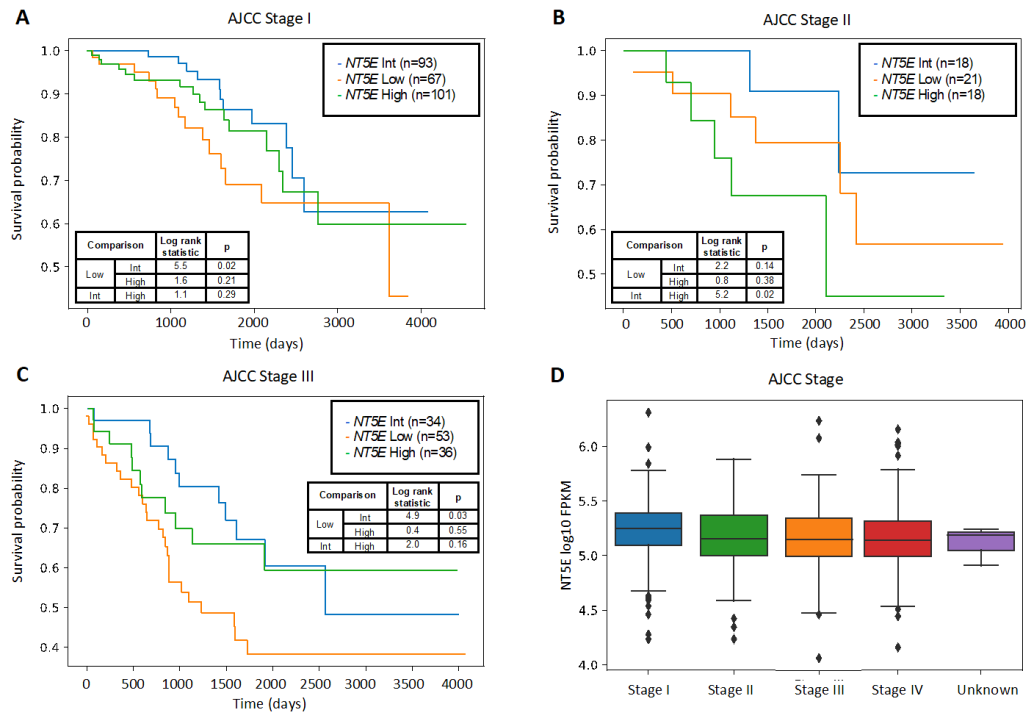

**Supplementary Figure 4: Correlation of ADORA2A expression in TCGA cohort with overall survival (A, B , C and D) and AJCC stage (E)**

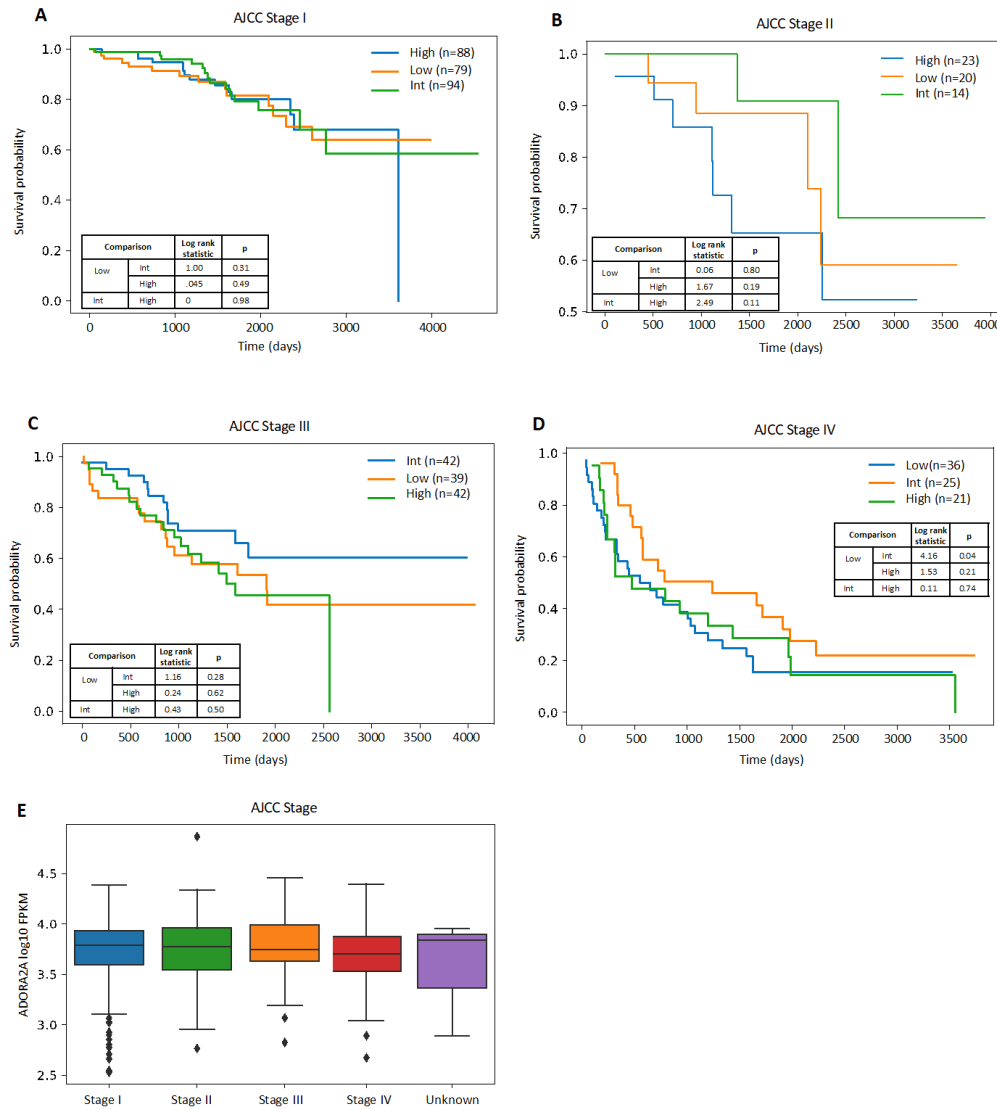

Supplement: jitc-2020-001467supp001.pdf [file jitc-2020-001467supp001.pdf]
